# Supplementary material
Source: Springer Nature journal article supplement (https://www.springermedizin.de/resource/supplementary/12888_2013_1431_MOESM2_ESM.pdf/9480248)

Total sample n = 251

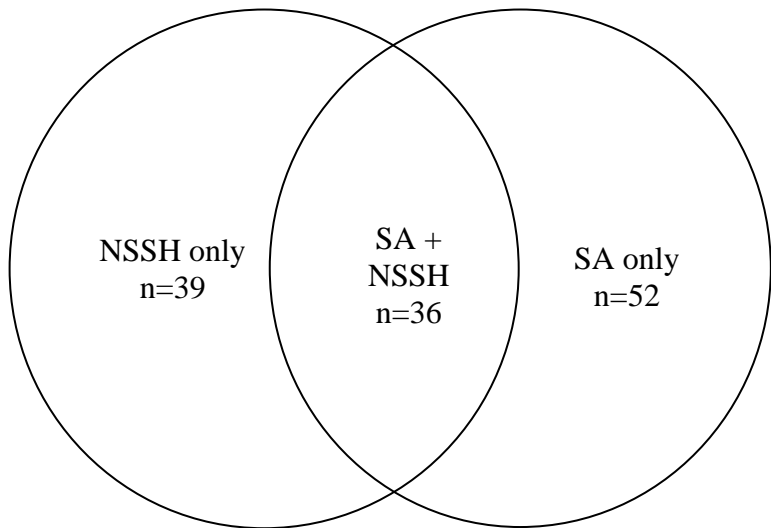

NoSH  
n=124

NoSA (n=163): NoSH + NSSH only

Supplement: MOESM2 [file 9480248]
